# Supplementary material
Source: PubMed Central journal article supplement (PMC5971478)
Supplement: JB.00086-18_zjb999094778s1.pdf [file JB.00086-18_zjb999094778s1.pdf]

Supplemental material for:

“Convergence of PASTA kinase and two-component signaling in response to cell wall stress in *Enterococcus faecalis*” by Kellogg, S. and Kristich, C.

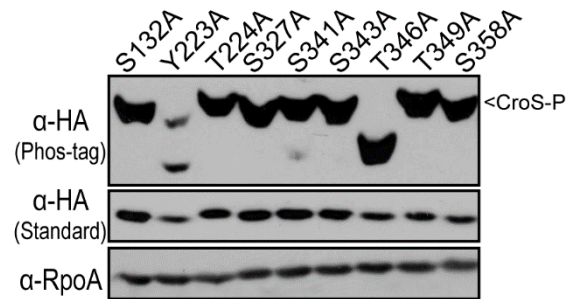

**Figure S1. Confirmation of Thr-346 as the critical site of CroS phosphorylation.** Phos-Tag and standard SDS-PAGE and immunoblot analysis of an *E. faecalis*  $\Delta ireP$  mutant carrying variants of CroS-HA. Samples were harvested during exponential growth without the addition of cell wall stressors. Strains are JL457 with pSLK137-145. The overexposed immunoblot reveals that CroS Y223A still exhibits the slowly migrating isoform of CroS, indicating it can be phosphorylated, whereas the T346A mutant exhibits none of the slowly migrating isoform.
